# Supplementary material for: Wireless, skin-interfaced sensors for compression therapy
Source: PubMed Central journal article supplement — Sci Adv. 2020 Dec 4;6(49):eabe1655. doi: 10.1126/sciadv.abe1655 (PMC7821894; doi:10.1126/sciadv.abe1655), 2020-12-04
Supplement: supp_6_49_eabe1655__1.pdf [file supp_6_49_eabe1655__1.pdf]

## Supplementary Materials for

### **Wireless, skin-interfaced sensors for compression therapy**

Yoonseok Park, Kyeongha Kwon, Sung Soo Kwak, Da Som Yang, Jean Won Kwak, Haiwen Luan, Ted S. Chung, Keum San Chun, Jong Uk Kim, Hokyung Jang, Hanjun Ryu, Hyoyoung Jeong, Sang Min Won, Youn J. Kang, Michael Zhang, David Pontes, Brianna R. Kampmeier, Seon Hee Seo, Jeffrey Zhao, Inhwa Jung, Yonggang Huang, Shuai Xu\*, John A. Rogers\*

\*Corresponding author. Email: [steveXu@northwestern.edu](mailto:steveXu@northwestern.edu) (S.X); [jrogers@northwestern.edu](mailto:jrogers@northwestern.edu) (J.A.R.)

Published 4 December 2020, *Sci. Adv.* **6**, eabe1655 (2020)  
DOI: 10.1126/sciadv.abe1655

#### **The PDF file includes:**

Figs. S1 to S15  
Tables S1 and S2  
Legends for movies S1 and S2

#### **Other Supplementary Material for this manuscript includes the following:**

(available at [advances.sciencemag.org/cgi/content/full/6/49/eabe1655/DC1](https://advances.sciencemag.org/cgi/content/full/6/49/eabe1655/DC1))

Movies S1 and S2

**Movie S1. Wirelessly recorded pressure.** Fractional changes of pressure by finger

**Movie 2. Wirelessly monitored interface pressure using a bandage.** The change in applied pressure with the number of inelastic bandages wrapping on the arm.

**Fig. S1 Procedure for fabricating a 3D pressure sensor.** Schematic illustration of the steps.

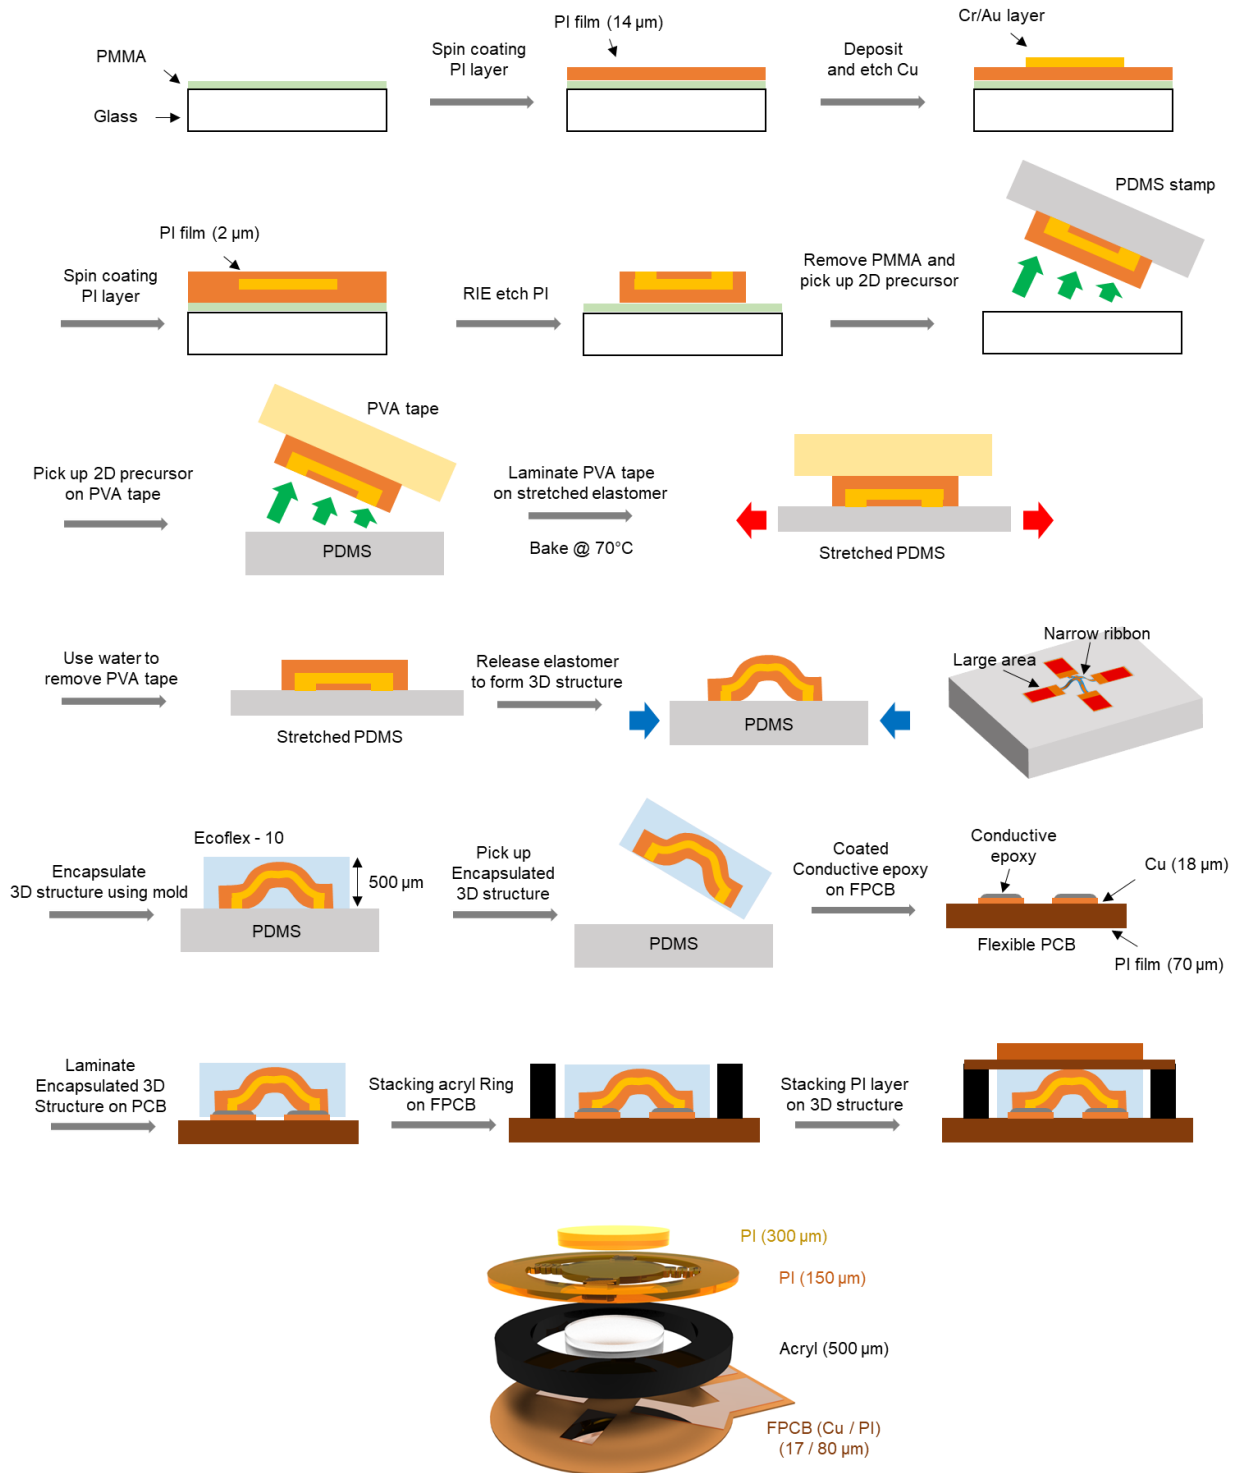

**Fig. S2. The design of a 3D pressure sensor. (A)** 2D precursor for a 3D pressure sensor. **(B)** Magnified view of four gold serpentine wires. **(C)** Layouts of polyimide, pressure sensor, acrylic ring and FPCB.

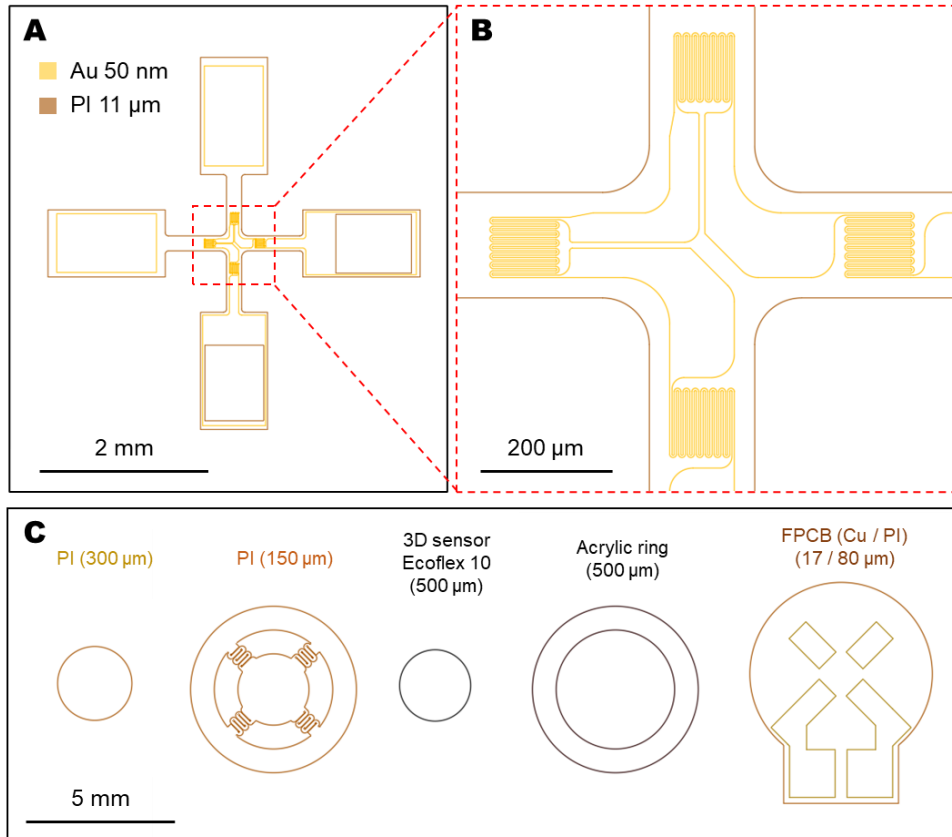

**Fig. S3. Computed strains for a metal trace under compression of 0% and 12%. The maximum principal strain ( $\epsilon_{max}$ ) over the metal trace of 3D structure and 2D structure under 0% and 12% compression.**

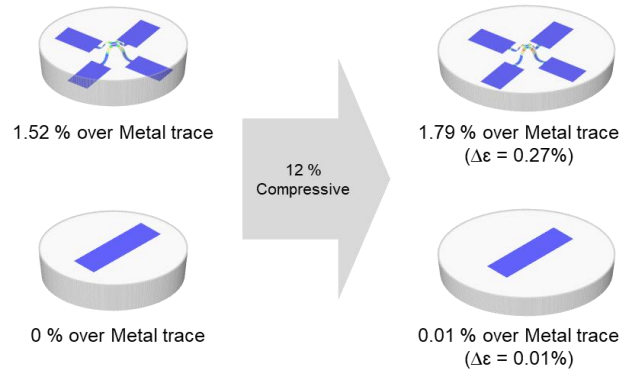

**Fig. S4. Computed strains for a metal trace under compression of 0%, 12% and 24%. The maximum principal strain ( $\epsilon_{max}$ ) over the metal trace of 3D structure under 0%, 12% and 24% compression.**

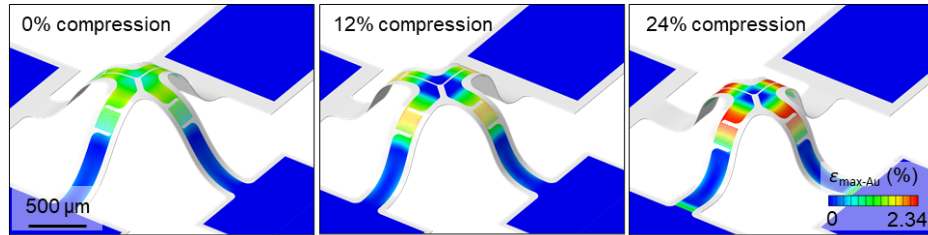

**Fig. S5. Computed change in strain for a metal trace under compression of 2.5%.** The change in maximum principal strain for a metal trace under compression of 2.5%.

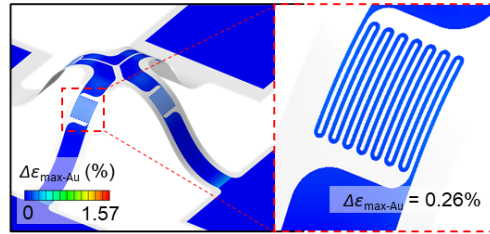

**Fig. S6. Bland-Altman plots between the two paired measurements of Fig 3D. Measurement from NTC temperature sensor of SCV and IR camera**

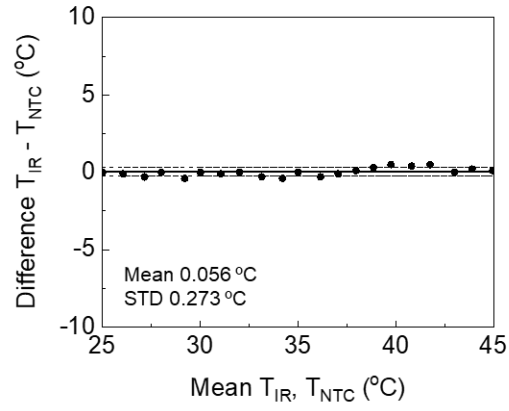



**Fig. S7. Temperature dependent changes in resistance of the SCV and deformation - pressure relation of Ecoflex 10.** (A) Change in resistance of the SCV as a function of temperature variation (room temperature 25 °C and skin temperature 32 °C). (B) Relation between deformation and pressure of Ecoflex 10.

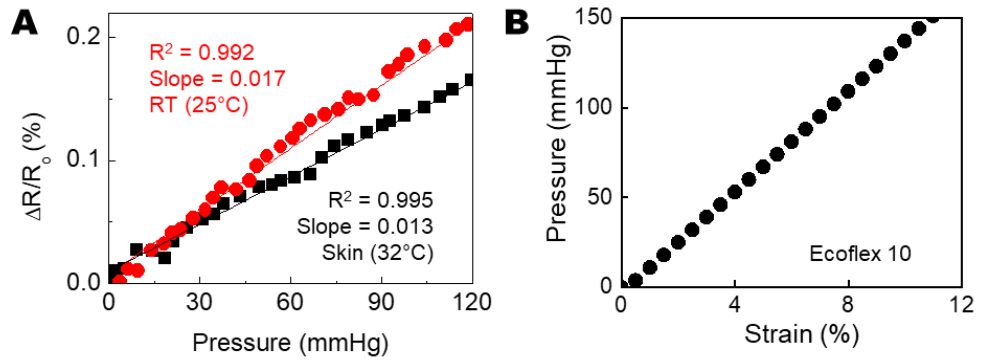

**Fig. S8. Experimental set up for testing feasibility of 3D pressure sensor and reference device using universal testing machine (UTM)** Optical microscopic image shows 3D sensor placing on (A) flat substrate, (B) curved substrate and (C) curved substrate with steel pin. Photo credit: Yoonseok Park, Northwestern University.

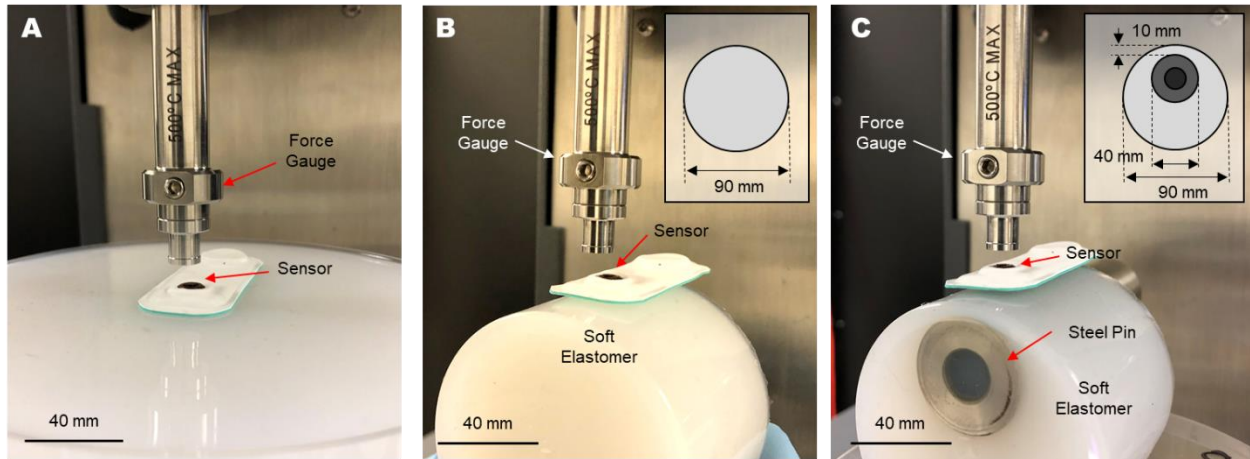

**Fig. S9. Bland-Altman plots between the two paired measurements of Fig 4B.** Measurement from (left) reference sensor and applied pressure from UTM and (right) 3D pressure sensor and applied pressure on flat rigid substrates.

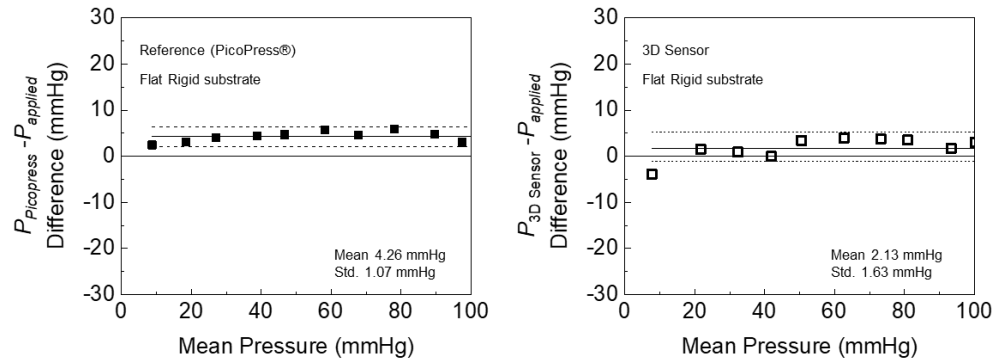

**Fig. S10. Bland-Altman plots between the two paired measurements of Fig 4C.** Measurement from (top) reference sensor and applied pressure from UTM and (bottom) 3D pressure sensor and applied pressure on flat substrates consist of three different elastomer (left) dragon skin 10;  $E = 137$  kPa, (middle) Ecoflex 00-50;  $E = 83$  kPa, (right) Ecoflex 00-30;  $E = 69$  kPa.

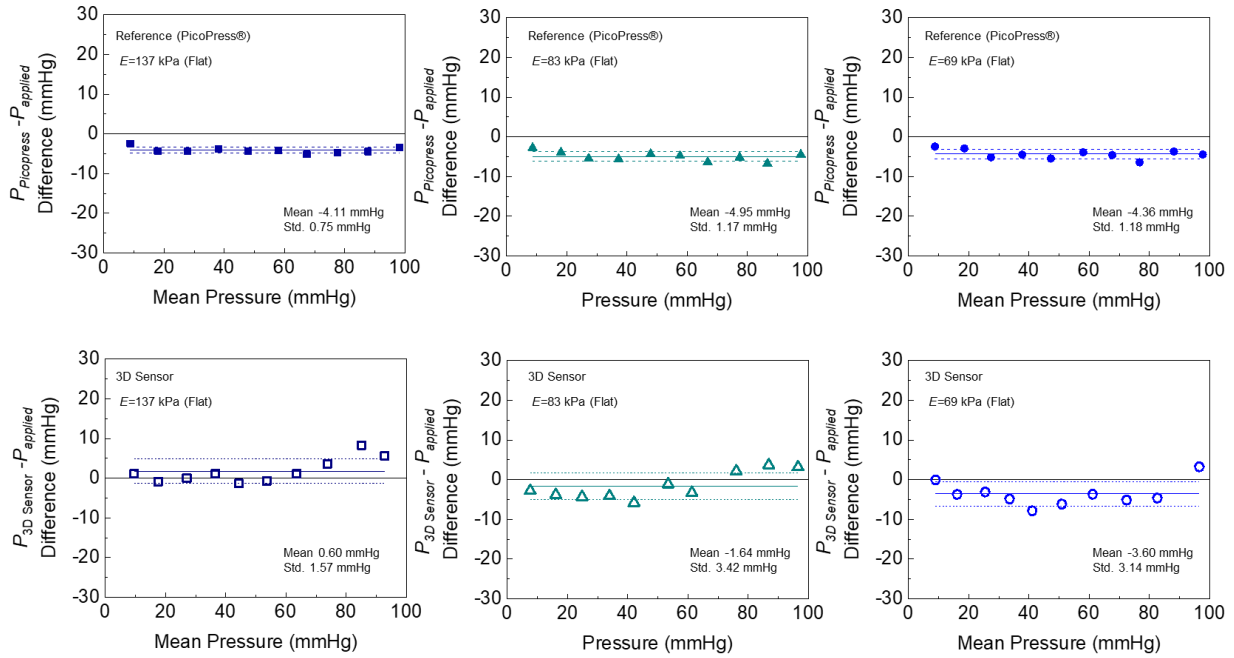

**Fig. S11. Bland-Altman plots between the two paired measurements of Fig 4D.** Measurement from (top) reference sensor and applied pressure from UTM and (bottom) 3D pressure sensor and applied pressure on curved substrates consist of three different elastomer (left) dragon skin 10;  $E = 137$  kPa, (middle) Ecoflex 00-50;  $E = 83$  kPa, (right) Ecoflex 00-30;  $E = 69$  kPa.

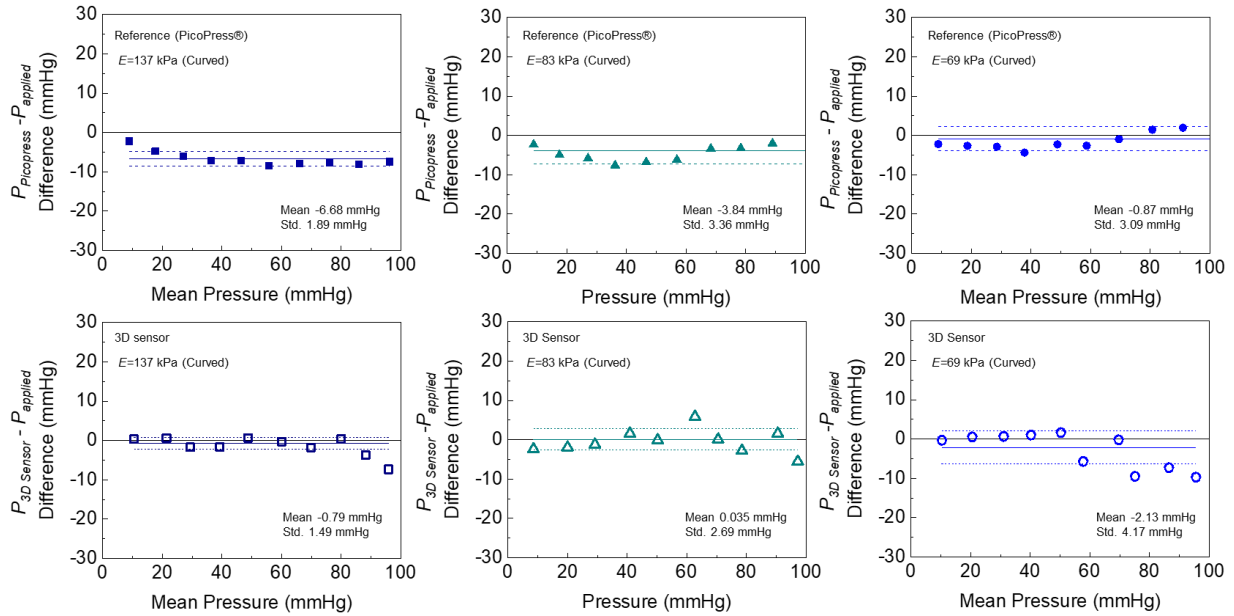

**Fig. S12. Measurement of 3D sensor and reference equipment on the curved surface with metal rod inside.** (A) Changes in resistance of 3D sensor and in pressure of reference equipment as a function of applied pressure using DMA on curved surface with metal rod inside with different materials (elastomers with different elastic modulus; dragon skin 10 ( $E = 137$  kPa), Ecoflex 00-50 ( $E = 83$  kPa), Ecoflex 00-30 ( $E = 69$  kPa)). Bland-Altman plots between the two paired measurements; (B) reference sensor and applied pressure from UTM and (C) 3D pressure sensor and applied pressure on curved substrates with metal pin consist of three different elastomer (left) dragon skin 10;  $E = 137$  kPa, (middle) Ecoflex 00-50;  $E = 83$  kPa, (right) Ecoflex 00-30;  $E = 69$  kPa.

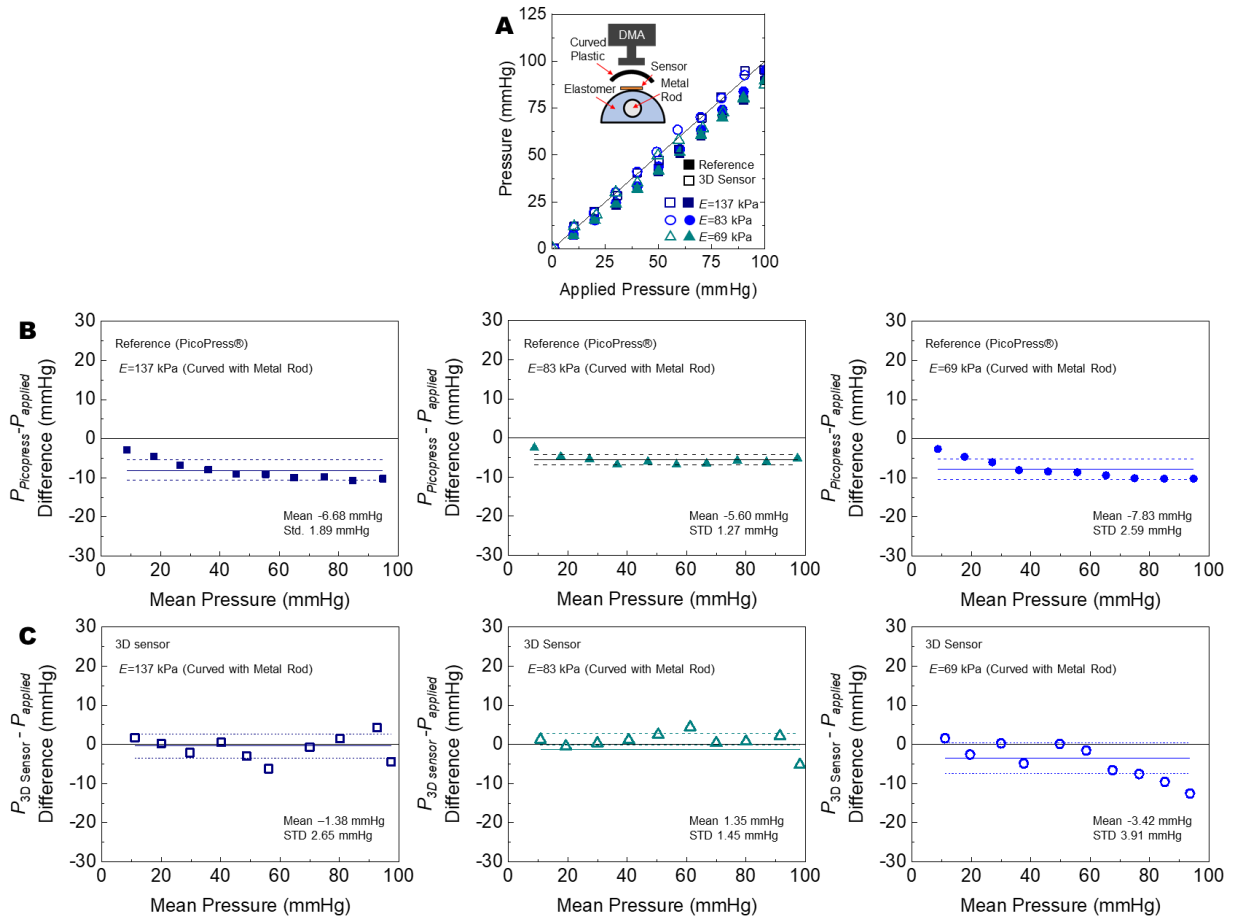

**Fig. S13. Optical images of wearing GCS adhering reference equipment and SCV inside. (A)** Air pocket, air tube and monitor of an air bladder type reference equipment (PicoPress®). **(B)** SCV inside GCS. Photo credit: Yoonseok Park, Northwestern University.

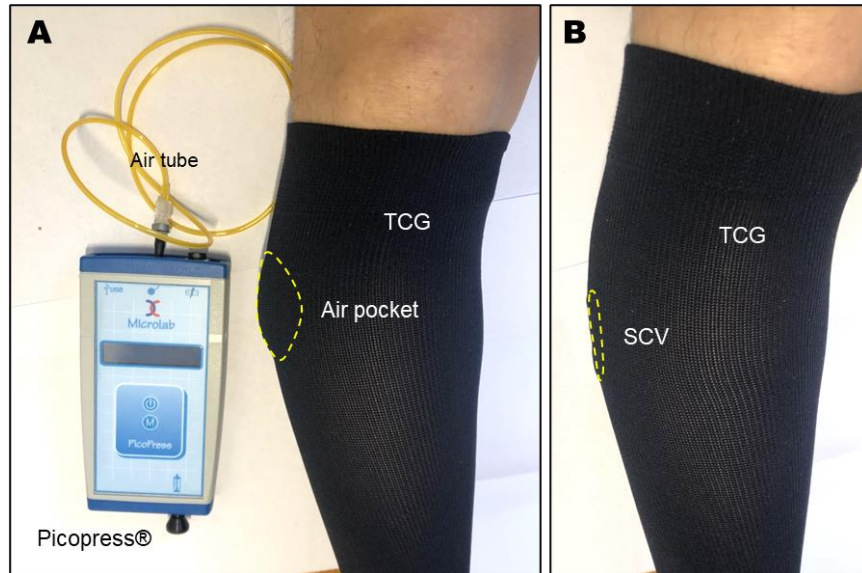





**Fig. S15. Optical images of a pressed mark on a leg.** After 6 h with SCV while wearing 20-30 mmHg GCS and recovery over time (5, 20 and 30 minutes after relaxation). Photo credit: Yoonseok Park, Northwestern University.

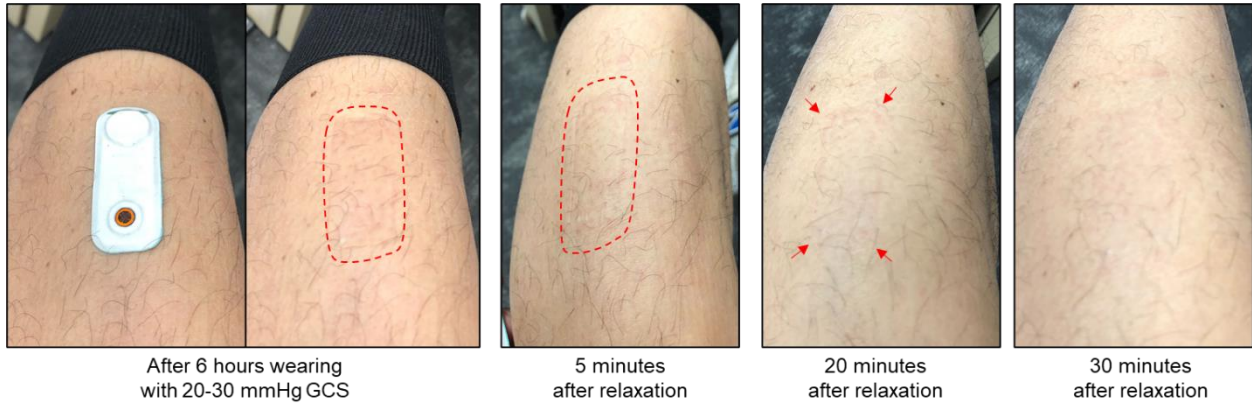

**Table S1 Correlation constants for pressure/temperature measurement.**

| Device Number | Temperature |      | ADC <sub>ntc</sub><br>(32° C) | Pressure |          |       | ADC <sub>pressure</sub><br>(0 mmHg) |
|---------------|-------------|------|-------------------------------|----------|----------|-------|-------------------------------------|
|               | $C_T$       | $n$  |                               | $C_{p1}$ | $C_{p2}$ | $m$   |                                     |
| 1             | 0.0049      | 4257 | 2273                          | 0.15     | 0.49     | 101.7 | 2161                                |
| 2             | 0.0052      | 3655 | 2875                          | 0.24     | 0.41     | 365.1 | 2480                                |
| 3             | 0.0049      | 2650 | 3880                          | 0.22     | 0.51     | 401.1 | 3386                                |
| 4             | 0.0049      | 4150 | 2380                          | 0.24     | 0.42     | 409.6 | 2045                                |

**Table S2 Information of participants who participated in this study.**

| Participant number | age | Circumstance (Left / Right) |         | Sex | Ethnicity        | Pathology        |
|--------------------|-----|-----------------------------|---------|-----|------------------|------------------|
|                    |     | Ankle                       | Calf    |     |                  |                  |
| 1                  | 89  | 24 / 24                     | 34 / 34 | M   | African American | -                |
| 2                  | 74  | 36 / 35                     | 56 / 49 | F   | African American | Venus leg ulcers |
| 3                  | 87  | 26 / 25                     | 34 / 34 | F   | African American | -                |
| 4                  | 87  | 24 / 24                     | 40 / 39 | F   | South Asian      | -                |
| 5                  | 69  | 26 / 26                     | 41 / 40 | F   | Caucasian        | Varicose veins   |
| 6                  | 61  | 27 / 26                     | 40 / 40 | M   | Caucasian        | -                |
| 7                  | 62  | 22 / 22                     | 38 / 39 | F   | Caucasian        | -                |
| 8                  | 74  | 26 / 26                     | 37 / 37 | F   | Caucasian        | -                |
